# Supplementary material
Source: PubMed Central journal article supplement (PMC6990805)
Supplement: jamapediatr-174-287-s001.pdf [file jamapediatr-174-287-s001.pdf]

## Supplementary Online Content

Hoffmann JA, Farrell CA, Monuteaux MC, Fleegler EW, Lee LK. Association of pediatric suicide with county-level poverty in the United States, 2007-2016. *JAMA Pediatr*. Published online January 27, 2020. doi:10.1001/jamapediatrics.2019.5678

**eTable.** Suicide Methods Among Children 5-19 Years Old, 2007-2016

This supplementary material has been provided by the authors to give readers additional information about their work.

**eTable.** Suicide Methods Among Children 5-19 Years Old, 2007-2016

| <b>Suicide Method<sup>a</sup></b>         | <b>Suicides, N (%)</b> |
|-------------------------------------------|------------------------|
| Suffocation                               | 9631 (45.9)            |
| Firearm                                   | 8619 (41.1)            |
| Poisoning                                 | 1282 (6.1)             |
| Fall                                      | 438 (2.1)              |
| Other Specified, Classifiable             | 425 (2.0)              |
| Drowning                                  | 160 (0.8)              |
| All Transport                             | 143 (0.7)              |
| Other Specified, Not Elsewhere Classified | 93 (0.4)               |
| Cut/Pierce                                | 76 (0.4)               |
| Unspecified                               | 67 (0.3)               |
| Fire/flame                                | 48 (0.2)               |

a. As classified by the External Cause of Injury (E-code) Mortality Matrix
